# Supplementary material for: Detecting and measuring deprivation in primary care: development, reliability and validity of a self-reported questionnaire: the DiPCare-Q
Source: PubMed Central journal article supplement — BMJ Open. 2012 Feb 3;2(1):e000692. doi: 10.1136/bmjopen-2011-000692 (PMC3274718; doi:10.1136/bmjopen-2011-000692), 2012-02-03
Supplement: bmjopen-2011-000692-s1.pdf [file bmjopen-2011-000692-s1.pdf]

## DiPCare-Q in English, French, German, and Italian

## Instructions for calculating DiPCare-Q indexes

- a) Code all 16 questions (D1 to D16) “1” for “Yes” and “0” for “No”.
- b) Recode questions D7, D8, D9, D11, and D12 “1” to “0” and “0” to “1” for all positive items to be related to deprivation.
- c) Generate the following indexes:
  - Material deprivation index:  $D1+D2+D3+D4+D5+D6+D10+D13$
  - Social deprivation index:  $D7+D8+D9+D11+D12$
  - Health deprivation index:  $D14+D15+D16$
- d) Calculating overall deprivation index: DiPCare-Q index
  1. Generate categories of deprivation from the corresponding index:

Material deprivation categories: generate the following categories from the material deprivation index: 1 to 2 = 1, 3 to 6 = 2, 7 to 8 = 3

Social deprivation categories = social deprivation index

Health deprivation categories: generate the following categories from the health deprivation index 0 to 1 = 0, 2 to 3 = 1
  2. Using these variables, compute the overall deprivation index using the following equation for each participant:
$$\text{index} = 0.810 \cdot \text{mat\_cat} + 0.455 \cdot \text{soc\_cat} + 0.711 \cdot \text{health\_cat}$$
  3. Round result to the closest unit ending with an index of 5 levels of deprivation.

## STATA commands

```
recode d7 0=1 1=0
recode d8 0=1 1=0
recode d9 0=1 1=0
recode d11 0=1 1=0
recode d12 0=1 1=0

gen mat_dep=d1+d2+d3+d4+d5+d6+2*d10+d13
gen soc_dep= d7+d8+d9+d11+d12
gen health_dep= d14+d15+d16
gen mat_cat=mat_dep
```

```
recode mat_cat 2=1 3/6=2 7/8=3

gen health_cat=health_dep

recode health_cat 1=0 2/3=1

gen index= 0.810*mat_cat + 0.455*soc_dep + 0.711*health_cat

recode index 0/0.5=0 0.5000001/1.5=1 1.5000001/2.5=2 2.5000001/3.5=3 3.5000001/4.5=4 4.5000001/5.5=5
5.500001/6.5=6
```

We would like you to answer the following questions dealing with your personal finances, social environment and general health. Please mark with an X (☒) the answer that best applies to your own situation.

- |                                                                                                                                                                             |                          |                          |
|-----------------------------------------------------------------------------------------------------------------------------------------------------------------------------|--------------------------|--------------------------|
| 1. During the <u>last 12 months</u> , have you had trouble paying <u>your household bills</u> (taxes, insurance, telephone, electricity, credit cards, etc.)?               | <input type="checkbox"/> | <input type="checkbox"/> |
|                                                                                                                                                                             | Yes                      | No                       |
| 2. During the <u>last 12 months</u> , have you had to ask your immediate family for money to cover your <u>basic day-to-day needs</u> ?                                     | <input type="checkbox"/> | <input type="checkbox"/> |
|                                                                                                                                                                             | Yes                      | No                       |
| 3. During the <u>last 12 months</u> , has a member of <u>your household</u> not sought treatment (dentist, doctor, buying medication) because you didn't have enough money? | <input type="checkbox"/> | <input type="checkbox"/> |
|                                                                                                                                                                             | Yes                      | No                       |
| 4. During the <u>last 12 months</u> , have you feared being evicted from or losing your home?                                                                               | <input type="checkbox"/> | <input type="checkbox"/> |
|                                                                                                                                                                             | Yes                      | No                       |
| 5. During the <u>last 12 months</u> , have you not bought clothes even though you or a member of <u>your household</u> needed them?                                         | <input type="checkbox"/> | <input type="checkbox"/> |
|                                                                                                                                                                             | Yes                      | No                       |
| 6. During the <u>last 12 months</u> , have you not bought furniture or household goods even though you or a member of <u>your household</u> needed them?                    | <input type="checkbox"/> | <input type="checkbox"/> |
|                                                                                                                                                                             | Yes                      | No                       |
| 7. During the <u>last 12 months</u> , have you gone on holiday?                                                                                                             | <input type="checkbox"/> | <input type="checkbox"/> |
|                                                                                                                                                                             | Yes                      | No                       |
| 8. During the <u>last 3 months</u> , have you spent an evening in the company of close family members or friends?                                                           | <input type="checkbox"/> | <input type="checkbox"/> |
|                                                                                                                                                                             | Yes                      | No                       |
| 9. During the <u>last 3 months</u> , have you been to the cinema, the theatre, a concert or a sports event?                                                                 | <input type="checkbox"/> | <input type="checkbox"/> |
|                                                                                                                                                                             | Yes                      | No                       |
| 10. During the <u>last month</u> , has there been an occasion when <u>your household</u> did not have enough to eat?                                                        | <input type="checkbox"/> | <input type="checkbox"/> |
|                                                                                                                                                                             | Yes                      | No                       |
| 11. During the <u>last month</u> , have you been able to access the internet (at home, at work, at a library, at an internet café, etc.)?                                   | <input type="checkbox"/> | <input type="checkbox"/> |
|                                                                                                                                                                             | Yes                      | No                       |
| 12. If you're in difficulty, is there someone <u>outside your household</u> to whom you can turn for material help (money, food, accommodation)?                            | <input type="checkbox"/> | <input type="checkbox"/> |
|                                                                                                                                                                             | Yes                      | No                       |
| 13. Are you <u>currently</u> finding it very difficult to pay back money (to the bank, family, friend etc.)?                                                                | <input type="checkbox"/> | <input type="checkbox"/> |
|                                                                                                                                                                             | Yes                      | No                       |
| 14. Do you <u>currently</u> suffer from a physical disability that has a major impact on your day-to-day life?                                                              | <input type="checkbox"/> | <input type="checkbox"/> |
|                                                                                                                                                                             | Yes                      | No                       |
| 15. Do you <u>currently</u> suffer from mental health issues or problems that have a major impact on your day-to-day life?                                                  | <input type="checkbox"/> | <input type="checkbox"/> |
|                                                                                                                                                                             | Yes                      | No                       |
| 16. Do you <u>currently</u> have problems linked to alcohol consumption, drug-taking, gambling etc.?                                                                        | <input type="checkbox"/> | <input type="checkbox"/> |
|                                                                                                                                                                             | Yes                      | No                       |

**Vous êtes invité(e) à répondre aux questions suivantes qui vous interrogent sur votre situation matérielle, sociale, et votre état de santé. Mettez une croix (☒) dans la case qui correspond le mieux à votre situation en répondant à oui ou non à toutes les questions suivantes.**

- |                                                                                                                                                                                                        |                          |                          |
|--------------------------------------------------------------------------------------------------------------------------------------------------------------------------------------------------------|--------------------------|--------------------------|
| 1. Durant les <u>12 derniers mois</u> , avez-vous eu de la peine à payer les factures de votre <u>ménage</u> (impôts, assurances, téléphone, électricité, cartes de crédit, etc.) ?                    | <input type="checkbox"/> | <input type="checkbox"/> |
|                                                                                                                                                                                                        | Oui                      | Non                      |
| 2. Durant les <u>12 derniers mois</u> , avez-vous eu besoin de demander de l'argent à des proches pour des besoins quotidiens ?                                                                        | <input type="checkbox"/> | <input type="checkbox"/> |
|                                                                                                                                                                                                        | Oui                      | Non                      |
| 3. Durant les <u>12 derniers mois</u> , quelqu'un <u>dans votre ménage</u> a-t-il dû renoncer à se faire soigner parce que vous n'aviez pas assez d'argent (dentiste, médecin, achat de médicaments) ? | <input type="checkbox"/> | <input type="checkbox"/> |
|                                                                                                                                                                                                        | Oui                      | Non                      |
| 4. Durant les <u>12 derniers mois</u> , avez-vous eu peur d'être expulsé(e) de votre logement ou de perdre votre habitation ?                                                                          | <input type="checkbox"/> | <input type="checkbox"/> |
|                                                                                                                                                                                                        | Oui                      | Non                      |
| 5. Durant les <u>12 derniers mois</u> , avez-vous dû renoncer à acheter des habits alors que vous-même ou un membre <u>de votre ménage</u> en avait pourtant besoin ?                                  | <input type="checkbox"/> | <input type="checkbox"/> |
|                                                                                                                                                                                                        | Oui                      | Non                      |
| 6. Durant les <u>12 derniers mois</u> , avez-vous dû renoncer à acheter des meubles ou des appareils alors que vous ou un membre <u>de votre ménage</u> en aviez pourtant besoin ?                     | <input type="checkbox"/> | <input type="checkbox"/> |
|                                                                                                                                                                                                        | Oui                      | Non                      |
| 7. Durant les <u>12 derniers mois</u> , êtes-vous partis en vacances ?                                                                                                                                 | <input type="checkbox"/> | <input type="checkbox"/> |
|                                                                                                                                                                                                        | Oui                      | Non                      |
| 8. Durant les <u>3 derniers mois</u> , avez-vous partagé une soirée avec des proches ou des amis ?                                                                                                     | <input type="checkbox"/> | <input type="checkbox"/> |
|                                                                                                                                                                                                        | Oui                      | Non                      |
| 9. Durant les <u>3 derniers mois</u> , avez-vous été au cinéma, au théâtre, à un concert ou à un événement sportif ?                                                                                   | <input type="checkbox"/> | <input type="checkbox"/> |
|                                                                                                                                                                                                        | Oui                      | Non                      |
| 10. Durant le <u>dernier mois</u> , est-il arrivé qu'il n'y ait pas assez à manger dans votre <u>ménage</u> ?                                                                                          | <input type="checkbox"/> | <input type="checkbox"/> |
|                                                                                                                                                                                                        | Oui                      | Non                      |
| 11. Durant le <u>dernier mois</u> , avez-vous eu la possibilité d'accéder à Internet (maison, travail, bibliothèque, Internet café, etc.) ?                                                            | <input type="checkbox"/> | <input type="checkbox"/> |
|                                                                                                                                                                                                        | Oui                      | Non                      |
| 12. En cas de difficulté, pourriez-vous faire appel à des personnes <u>extérieures à votre ménage</u> pour vous apporter une aide matérielle (argent, nourriture, logement) ?                          | <input type="checkbox"/> | <input type="checkbox"/> |
|                                                                                                                                                                                                        | Oui                      | Non                      |
| 13. <u>Actuellement</u> , le remboursement d'argent (banque, famille, proche, etc.) vous pose-t-il un problème important ?                                                                             | <input type="checkbox"/> | <input type="checkbox"/> |
|                                                                                                                                                                                                        | Oui                      | Non                      |
| 14. <u>Actuellement</u> , souffrez-vous d'un handicap physique qui a des conséquences importantes sur votre vie quotidienne ?                                                                          | <input type="checkbox"/> | <input type="checkbox"/> |
|                                                                                                                                                                                                        | Oui                      | Non                      |
| 15. <u>Actuellement</u> , souffrez-vous de difficultés ou problèmes psychiques qui ont des conséquences importantes sur votre vie quotidienne ?                                                        | <input type="checkbox"/> | <input type="checkbox"/> |
|                                                                                                                                                                                                        | Oui                      | Non                      |
| 16. <u>Actuellement</u> , avez-vous des difficultés liées à une consommation d'alcool, de drogue, de jeu, ou autres ?                                                                                  | <input type="checkbox"/> | <input type="checkbox"/> |
|                                                                                                                                                                                                        | Oui                      | Non                      |

Beantworten Sie bitte die die folgenden Fragen zu Ihrer materiellen und sozialen Situation sowie zu Ihrem Gesundheitszustand. Kreuzen Sie das Feld an (☒), das Ihrer Situation am besten entspricht und beantworten Sie sämtliche der folgenden Fragen mit Ja oder Nein.

- |                                                                                                                                                                                                 |                                |                                  |
|-------------------------------------------------------------------------------------------------------------------------------------------------------------------------------------------------|--------------------------------|----------------------------------|
| 1. Hatten Sie in den <u>letzten 12 Monaten</u> Schwierigkeiten, die Rechnungen <u>Ihres Haushalts</u> zu bezahlen (Steuern, Versicherungen, Telefon, Strom, Kreditkarten usw.)?                 | <input type="checkbox"/><br>Ja | <input type="checkbox"/><br>Nein |
| 2. Mussten Sie in den <u>letzten 12 Monaten</u> bei Angehörigen Geld für den täglichen Bedarf ausleihen?                                                                                        | <input type="checkbox"/><br>Ja | <input type="checkbox"/><br>Nein |
| 3. Musste in den <u>letzten 12 Monaten</u> jemand in <u>Ihrem Haushalt</u> auf medizinische Versorgung verzichten, weil Sie nicht genügend Geld hatten (Zahnarzt, Arzt, Kauf von Medikamenten)? | <input type="checkbox"/><br>Ja | <input type="checkbox"/><br>Nein |
| 4. Hatten Sie in den <u>letzten 12 Monaten</u> Angst, aus Ihrer Wohnung hinausgeworfen zu werden oder Ihre Bleibe zu verlieren?                                                                 | <input type="checkbox"/><br>Ja | <input type="checkbox"/><br>Nein |
| 5. Mussten Sie in den <u>letzten 12 Monaten</u> auf den Kauf von Kleidung verzichten, obwohl Sie selber oder ein Mitglied <u>Ihres Haushalts</u> diese benötigten?                              | <input type="checkbox"/><br>Ja | <input type="checkbox"/><br>Nein |
| 6. Mussten Sie in den <u>letzten 12 Monaten</u> auf den Kauf von Möbeln oder Geräten verzichten, obwohl Sie selber oder ein Mitglied <u>Ihres Haushalts</u> diese benötigten?                   | <input type="checkbox"/><br>Ja | <input type="checkbox"/><br>Nein |
| 7. Sind Sie in den <u>letzten 12 Monaten</u> in die Ferien gefahren?                                                                                                                            | <input type="checkbox"/><br>Ja | <input type="checkbox"/><br>Nein |
| 8. Haben Sie in den <u>letzten 3 Monaten</u> einen Abend mit Angehörigen oder Freunden verbracht?                                                                                               | <input type="checkbox"/><br>Ja | <input type="checkbox"/><br>Nein |
| 9. Waren Sie in den <u>letzten 3 Monaten</u> im Kino, Theater, an einem Konzert oder einer Sportveranstaltung?                                                                                  | <input type="checkbox"/><br>Ja | <input type="checkbox"/><br>Nein |
| 10. Ist es <u>im letzten Monat</u> vorgekommen, dass es in <u>Ihrem Haushalt</u> nicht genug zu essen gab?                                                                                      | <input type="checkbox"/><br>Ja | <input type="checkbox"/><br>Nein |
| 11. Hatten Sie <u>im letzten Monat</u> die Möglichkeit, ins Internet zu gelangen (zuhause, Arbeit, Bibliothek, Internet-Café usw.)?                                                             | <input type="checkbox"/><br>Ja | <input type="checkbox"/><br>Nein |
| 12. Können Sie bei Schwierigkeiten Personen, die <u>nicht Ihrem Haushalt angehören</u> , um materielle Hilfe bitten (Geld, Nahrungsmittel, Unterkunft)?                                         | <input type="checkbox"/><br>Ja | <input type="checkbox"/><br>Nein |
| 13. Haben Sie <u>gegenwärtig</u> grosse Schwierigkeiten, Geld zurückzuzahlen (Bank, Familie, Angehörige usw.)?                                                                                  | <input type="checkbox"/><br>Ja | <input type="checkbox"/><br>Nein |
| 14. Leiden Sie <u>derzeit</u> an einer körperlichen Behinderung, die weit reichende Auswirkungen auf Ihren Alltag hat?                                                                          | <input type="checkbox"/><br>Ja | <input type="checkbox"/><br>Nein |
| 15. Leiden Sie <u>derzeit</u> an psychischen Schwierigkeiten oder Problemen, die weit reichende Auswirkungen auf Ihren Alltag haben?                                                            | <input type="checkbox"/><br>Ja | <input type="checkbox"/><br>Nein |
| 16. Haben Sie <u>gegenwärtig</u> Probleme im Zusammenhang mit dem Konsum von Alkohol, Drogen, Spielen oder anderem?                                                                             | <input type="checkbox"/><br>Ja | <input type="checkbox"/><br>Nein |

ITALIAN

La invitiamo a rispondere a tutte le domande seguenti sulla sua situazione materiale e sociale e sul suo stato di salute. Metta una crocetta (☒) nella casella che meglio corrisponde alla sua situazione, rispondendo sì o no a tutte le domande seguenti.

- |                                                                                                                                                                                           |                          |                          |
|-------------------------------------------------------------------------------------------------------------------------------------------------------------------------------------------|--------------------------|--------------------------|
| 1. Negli <u>scorsi 12 mesi</u> ha fatto fatica a pagare le fatture del suo <u>nucleo familiare</u> (imposte, assicurazioni, telefono, elettricità, carte di credito, ecc.) ?              | <input type="checkbox"/> | <input type="checkbox"/> |
|                                                                                                                                                                                           | Si                       | No                       |
| 2. Negli <u>scorsi 12 mesi</u> ha avuto bisogno di chiedere denaro a persone a lei vicine per dei bisogni quotidiani ?                                                                    | <input type="checkbox"/> | <input type="checkbox"/> |
|                                                                                                                                                                                           | Si                       | No                       |
| 3. Negli <u>scorsi 12 mesi</u> qualcuno nel suo <u>nucleo familiare</u> ha dovuto rinunciare a delle cure perché non aveva denaro a sufficienza (dentista, medico, acquisto di farmaci) ? | <input type="checkbox"/> | <input type="checkbox"/> |
|                                                                                                                                                                                           | Si                       | No                       |
| 4. Negli <u>scorsi 12 mesi</u> ha avuto paura di essere sfrattato/a dalla sua abitazione o di perderla ?                                                                                  | <input type="checkbox"/> | <input type="checkbox"/> |
|                                                                                                                                                                                           | Si                       | No                       |
| 5. Negli <u>scorsi 12 mesi</u> ha dovuto rinunciare ad acquistare dei vestiti anche se lei stesso/a o un membro del suo <u>nucleo familiare</u> ne aveva bisogno ?                        | <input type="checkbox"/> | <input type="checkbox"/> |
|                                                                                                                                                                                           | Si                       | No                       |
| 6. Negli <u>scorsi 12 mesi</u> ha dovuto rinunciare ad acquistare dei mobili o degli apparecchi anche se lei stesso/a o un membro del suo <u>nucleo familiare</u> ne aveva bisogno?       | <input type="checkbox"/> | <input type="checkbox"/> |
|                                                                                                                                                                                           | Si                       | No                       |
| 7. Negli <u>scorsi 12 mesi</u> è andato/a in vacanza?                                                                                                                                     | <input type="checkbox"/> | <input type="checkbox"/> |
|                                                                                                                                                                                           | Si                       | No                       |
| 8. Negli <u>scorsi 3 mesi</u> ha passato una serata con persone a lei vicine o con amici ?                                                                                                | <input type="checkbox"/> | <input type="checkbox"/> |
|                                                                                                                                                                                           | Si                       | No                       |
| 9. Negli <u>scorsi 3 mesi</u> è andato/a al cinema, a teatro, a un concerto o a una manifestazione sportiva ?                                                                             | <input type="checkbox"/> | <input type="checkbox"/> |
|                                                                                                                                                                                           | Si                       | No                       |
| 10. Nello <u>scorso mese</u> è successo che non ci fosse cibo a sufficienza nel suo <u>nucleo familiare</u> ?                                                                             | <input type="checkbox"/> | <input type="checkbox"/> |
|                                                                                                                                                                                           | Si                       | No                       |
| 11. Nello <u>scorso mese</u> ha avuto la possibilità di accedere a Internet (casa, lavoro, biblioteca, Internet café, ecc.) ?                                                             | <input type="checkbox"/> | <input type="checkbox"/> |
|                                                                                                                                                                                           | Si                       | No                       |
| 12. In caso di difficoltà potrebbe fare affidamento su delle persone <u>all'esterno del suo nucleo familiare</u> per chiedere un aiuto materiale (denaro, cibo, abitazione) ?             | <input type="checkbox"/> | <input type="checkbox"/> |
|                                                                                                                                                                                           | Si                       | No                       |
| 13. <u>Attualmente</u> la restituzione di denaro (banca, famiglia, persone a lei vicine ecc.) rappresenta un problema importante per lei ?                                                | <input type="checkbox"/> | <input type="checkbox"/> |
|                                                                                                                                                                                           | Si                       | No                       |
| 14. <u>Attualmente</u> soffre di un handicap fisico che ha conseguenze importanti sulla sua vita quotidiana ?                                                                             | <input type="checkbox"/> | <input type="checkbox"/> |
|                                                                                                                                                                                           | Si                       | No                       |
| 15. <u>Attualmente</u> soffre di difficoltà o problemi psichici che hanno conseguenze importanti sulla sua vita quotidiana ?                                                              | <input type="checkbox"/> | <input type="checkbox"/> |
|                                                                                                                                                                                           | Si                       | No                       |
| 16. <u>Attualmente</u> ha difficoltà legate al consumo di alcool o droga, al gioco o altro ?                                                                                              | <input type="checkbox"/> | <input type="checkbox"/> |
|                                                                                                                                                                                           | Si                       | No                       |
